# Supplementary material
Source: publisher site journal article supplement (https://www.dovepress.com/get_supplementary_file.php?f=395242.docx)
Supplement: Supplementary file 1 [file get_supplementary_file.php]

Supplemental Table 1. Survey Respondent and Non-Respondent Analysis

|  | **Respondents*** | **Non-Respondents#** | **Standardized difference** |  |
| --- | --- | --- | --- | --- |
| **Number of patients, n (%)** | 610 (3.8%) | 15,298 (96.2%) |  |  |
| **Current Age, mean (SD)** | 73.3 (10.6) | 74.8 (11.9) | -0.13 |  |
| **Gender, Female, n (%)** | 334 (54.8%) | 8,474 (55.4%) | 0.11 |  |
| **Residence Region, n (%)** |  |  |  |  |
| Northeast | 80 (13.1%) | 2,654 (17.3%) | 0.25 |  |
| Midwest | 412 (67.5%) | 9,171 (59.9%) |  |  |
| South | 101 (16.6%) | 2,570 (16.8%) |  |  |
| West | 17 (2.8%) | 901 (5.9%) |  |  |
| Unknown | 0 (0.0%) | 2 (0.0%) |  |  |
| **Plan Type, n (%)** |  |  |  |  |
| HMO | 385 (63.1%) | 9,092 (59.4%) | 0.13 |  |
| PPO | 210 (34.4%) | 5,641 (36.9%) |  |  |
| CDHP | 15 (2.5%) | 565 (3.7%) |  |  |
| **Insurance Type, n (%)** |  |  |  |  |
| Medicare Advantage | 511 (83.8%) | 11,836 (77.4%) | 0.16 |  |
| Commercial | 99 (16.2%) | 3,462 (22.6%) |  |  |
| **Quan Enhanced Charlson Comorbidity Index scores, n (%)** | |  |  |  |
| 0 | 22 (3.6%) | 1,290 (8.4%) |  |  |
| 1 | 26 (4.3%) | 942 (6.2%) |  |  |
| 2 | 114 (18.7%) | 2,645 (17.3%) |  |  |
| 3+ | 448 (73.4%) | 10,421 (68.1%) |  |  |
| Mean (SD) | 3.8 (2.0) | 3.5 (2.2) | 0.11 |  |

* Completed the survey

# Not contacted, refused, or excluded

CDHP: Consumer-Driven Health Products; HMO: Health Maintenance Organization; PPO: Provider Preferred Organization; SD: Standard Deviation
